# Supplementary material for: STOP Pain Project—Opioid Response in Pediatric Cancer Patients and Gene Polymorphisms of Cytokine Pathways
Source: MDPI journal article supplement (doi:10.3390/pharmaceutics14030619), 2022-03-11
Supplement: s1 [file s1]

## Article

# STOP Pain Project—Opioid Response in Pediatric Cancer Patients and Gene Polymorphisms of Cytokine Pathways

Giada Crescioli <sup>1,2,†</sup>, Niccolò Lombardi <sup>1,2,\*,†</sup>, Laura Vagnoli <sup>3</sup>, Alessandra Bettiol <sup>4</sup>, Laura Giunti <sup>5</sup>, Valentina Cetica <sup>6</sup>, Maria Luisa Coniglio <sup>7</sup>, Aldesia Provenzano <sup>8</sup>, Sabrina Giglio <sup>8,9</sup>, Roberto Bonaiuti <sup>1</sup>, Alessandro Mugelli <sup>1</sup>, Maurizio Aricò <sup>5,10</sup>, Andrea Messeri <sup>11</sup>, Alfredo Vannacci <sup>1,2,†</sup> and Valentina Maggini <sup>1,12,\*,†</sup>

**Table S1.** Distribution of the SNPs in eight genes in the studied population.

| Gene           | N * | %     | Hardy-Weinberg<br>( <i>p</i> -Value) | MAF ° |
|----------------|-----|-------|--------------------------------------|-------|
| IL6 rs1800795  |     |       |                                      |       |
| GG             | 35  | 47.30 | 0.720                                | 0.416 |
| GC             | 30  | 40.54 |                                      |       |
| CC             | 9   | 12.16 |                                      |       |
| IL-6 rs1800796 |     |       |                                      |       |
| GG             | 63  | 85.13 | 0.930                                | 0.048 |
| GC             | 11  | 14.86 |                                      |       |
| CC             | 0   | 0     |                                      |       |
| IL-6 rs1800797 |     |       |                                      |       |
| AA             | 8   | 10.81 | 0.950                                | 0.408 |
| AG             | 29  | 39.19 |                                      |       |
| GG             | 37  | 50.00 |                                      |       |
| IL8 rs4073     |     |       |                                      |       |
| TT             | 24  | 32.43 | 0.950                                | 0.421 |
| TA             | 30  | 40.54 |                                      |       |
| AA             | 20  | 27.03 |                                      |       |
| TNFα rs1800629 |     |       |                                      |       |
| GG             | 63  | 85.13 | 0.930                                | 0.134 |
| GA             | 11  | 14.86 |                                      |       |
| AA             | 0   | 0     |                                      |       |

\* All patients have Caucasian origins. ° European Population of 1000 Genomes Project data (dbSNP-1000Genome-EUR).

**Table S2.** Association between genetic factors and safety outcomes after opioid treatment.

|                       | ADRs        |                | Gastrointestinal |                | SNC         |                |
|-----------------------|-------------|----------------|------------------|----------------|-------------|----------------|
|                       | N<br>Yes/No | OR<br>(95% CI) | N<br>Yes/No      | OR<br>(95% CI) | N<br>Yes/No | OR<br>(95% CI) |
| <b>IL-6 rs1800795</b> |             |                |                  |                |             |                |
| Co-dominant           |             |                |                  |                |             |                |
| C/C                   | 3/6         | 1              | 2/7              | 1              | 1/8         | 1              |

|                |       |                       |       |                        |      |                           |
|----------------|-------|-----------------------|-------|------------------------|------|---------------------------|
|                |       |                       |       |                        |      |                           |
| G/C            | 9/21  | 0.76<br>(0.134–4.282) | 8/22  | 1.21<br>(0.181–8.106)  | 3/27 | 0.18<br>(0.004–8.050)     |
| G/G            | 12/23 | 0.53<br>(0.083–3.377) | 9/26  | 1.03<br>(0.137–7.678)  | 4/31 | 0.01<br>(0.00–1.439)      |
| Dominant       |       |                       |       |                        |      |                           |
| C/C            | 3/6   | 1                     | 2/7   | 1                      | 1/8  | 1                         |
| G/C+G/G        | 21/44 | 0.66<br>(0.125–3.430) | 17/48 | 1.13<br>(0.183–7.042)  | 7/58 | 0.07<br>(0.001–3.604)     |
| Recessive      |       |                       |       |                        |      |                           |
| C/C+G/C        | 12/27 | 1                     | 10/29 | 1                      | 4/35 | 1                         |
| G/G            | 12/23 | 0.66<br>(0.180–2.387) | 9/26  | 1.29<br>(0.396–4.253)  | 4/31 | 0.03<br>(0.00–1.716)      |
| IL-6 rs1800796 |       |                       |       |                        |      |                           |
| Co-dominant    |       |                       |       |                        |      |                           |
| G/C            | 3/8   | 1                     | 2/9   | 1                      | 1/10 | 1                         |
| G/G            | 21/42 | 1.58<br>(0.303–8.225) | 17/46 | 2.10<br>(0.332–13.249) | 7/56 | 2.23<br>(0.099–49.893)    |
| IL-6 rs1800797 |       |                       |       |                        |      |                           |
| Co-dominant    |       |                       |       |                        |      |                           |
| A/A            | 3/5   | 1                     | 2/6   | 1                      | 1/7  | 1                         |
| A/G            | 9/20  | 0.64<br>(0.102–4.028) | 7/22  | 0.85<br>(0.112–6.521)  | 4/25 | 0.24<br>(0.006–8.909)     |
| G/G            | 12/25 | 0.42<br>(0.01–2.879)  | 10/27 | 0.87<br>(0.108–7.065)  | 3/34 | 0.01<br>(0.00–1.074)      |
| Dominant       |       |                       |       |                        |      |                           |
| A/A            | 3/5   | 1                     | 2/6   | 1                      | 1/7  | 1                         |
| G/G+ A/G       | 21/45 | 0.09<br>(0.02–3.584)  | 17/49 | 0.86<br>(0.125–5.979)  | 7/59 | 0.09<br>(0.002–3.584)     |
| Recessive      |       |                       |       |                        |      |                           |
| G/G            | 12/25 | 1                     | 10/27 | 1                      | 3/34 | 1                         |
| A/G+ A/A       | 12/25 | 1.68<br>(0.466–6.084) | 9/28  | 1.01<br>(0.295–3.860)  | 5/32 | 35.93<br>(0.990–1304.652) |
| IL-8- rs4073   |       |                       |       |                        |      |                           |
| Co-dominant    |       |                       |       |                        |      |                           |
| A/A            | 8/12  | 1                     | 7/13  | 1                      | 1/19 | 1                         |
| A/T            | 13/17 | 1.38<br>(0.374–5.117) | 12/18 | 1.30<br>(0.333–5.082)  | 4/26 | NA                        |
| T/T            | 3/21  | NA                    | 0/24  | -                      | 3/21 | NA                        |
| Dominant       |       |                       |       |                        |      |                           |
| A/A            | 8/12  | 1                     | 7/13  | 1                      | 1/19 | 1                         |
| A/T+T/T        | 16/38 | 0.74                  | 12/42 | 0.54                   | 7/47 | NA                        |

| (0.220–2.465)  |       |                       | (0.152–1.940) |                       |      |                        |
|----------------|-------|-----------------------|---------------|-----------------------|------|------------------------|
| Recessive      |       |                       |               |                       |      |                        |
| A/A+A/T        | 21/29 | 1                     | 19/31         | 1                     | 5/45 | 1                      |
| T/T            | 3/21  | 0.18<br>(0.038–0.819) | 0/24          | 1.19<br>(0.319–4.422) | 3/21 | 4.24<br>(0.412–43.539) |
| TNFα rs1800629 |       |                       |               |                       |      |                        |
| Co-dominant    |       |                       |               |                       |      |                        |
| A/G            | 4/7   | 1                     | 3/8           | 1                     | 1/10 | 1                      |
| G/G            | 20/43 | 0.81<br>(0.174–3.738) | 16/47         | 1.07<br>(0.202–5.621) | 7/56 | 0.68<br>(0.049–9.402)  |

Analysis adjusted for: age class, gender, Pi<sub>tt</sub>, diagnosis, metastasis. NA: not assessable.
